# Supplementary material
Source: publisher figshare collection journal article supplement (https://frontiersin.figshare.com/ndownloader/files/35571332)
Supplement: Supplementary file [file 35571332]

*Supplementary Material*

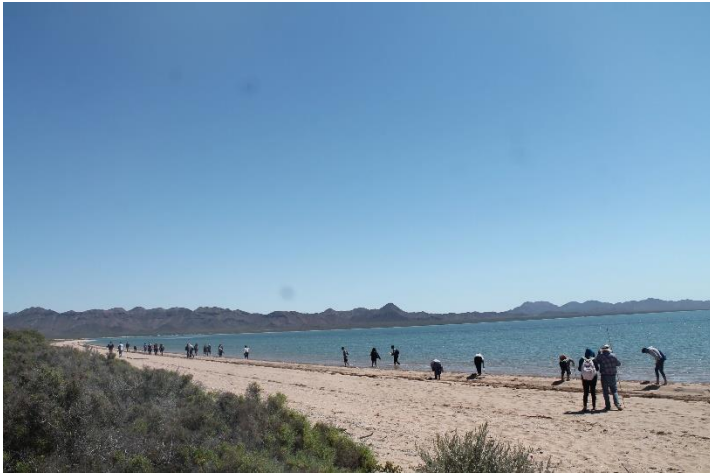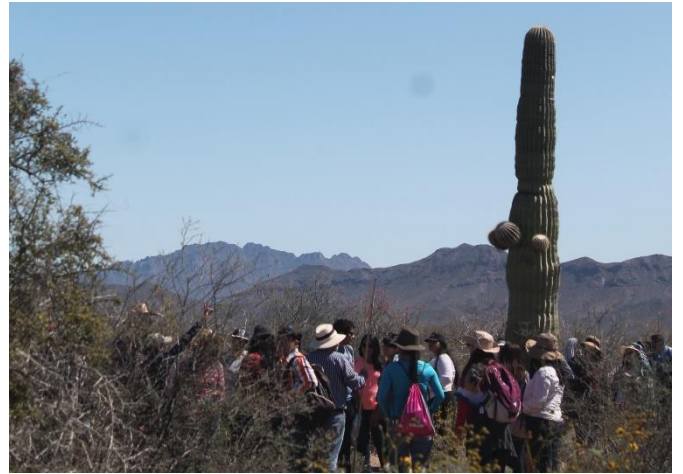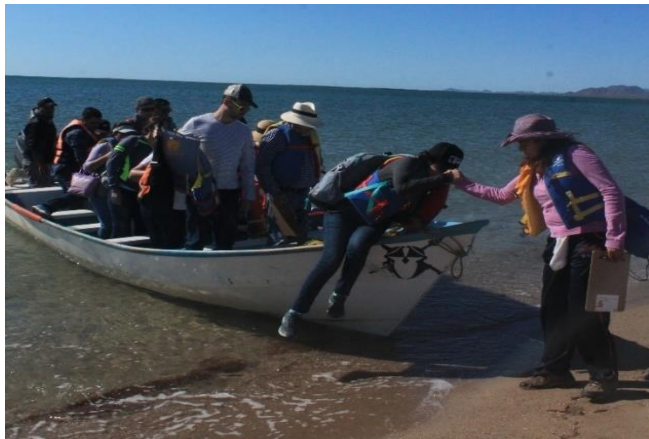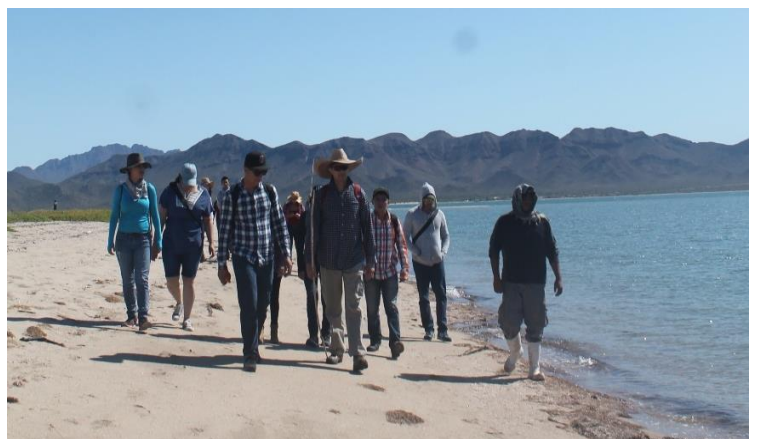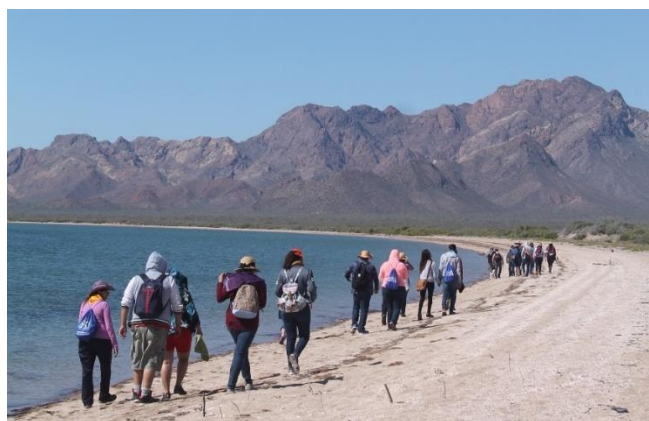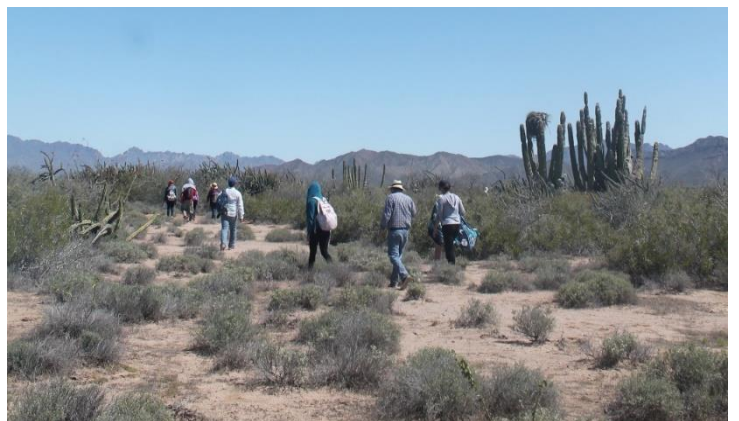

*Pictures taken during the outdoor experience on Isla Del Tiburon*

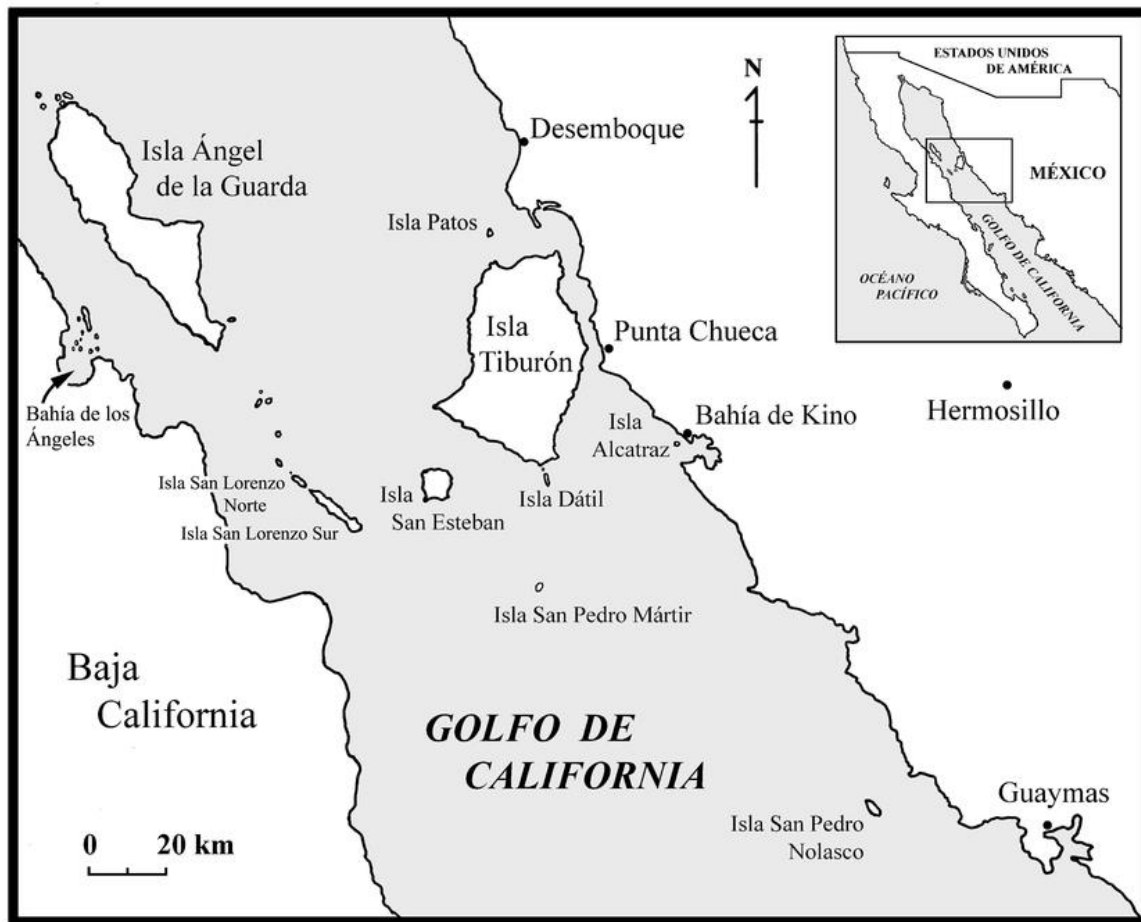

*Supplementary figure 1.* Isla del Tiburon Location. Map by Cathy Moser Marlett.
